# Supplementary material
Source: HighWire-hosted journal article supplement (https://bmjophth.bmj.com/content/4/1/e000275)
Supplement: inline-supplementary-material-2 [file inline-supplementary-material-2.docx]

**Supplementary Table 2** The number of cases with and without retinal haemorrhages, by aetiology and imaging sessions.

|  |  | Total number of children | Number with RetCam  imaging | Number with Ophthalmoscopy | Number with only one RetCam Imaging session | Number of these cases with no RHs present | Number of these cases with RHs present | Total  Number of cases with  RHs | Number with RHs and more than one RetCam Imaging Session | Serial Imaging Sessions in 18  Cases used in study | | | | | | Total  Serially Imaged cases in Study |
| --- | --- | --- | --- | --- | --- | --- | --- | --- | --- | --- | --- | --- | --- | --- | --- | --- |
|  | N imaging sessions |  |  |  |  |  |  |  |  | 2 | 3 | 4 | 7 | 8 | 10 |  |
|  | Total Number of children | 114 | 80 | 34 | 61/80 | 48/61 | 13/61 | 34 (a) | 19 (b) | 7 | 5 | 2 | 1 | 1 | 2 | 18 |
|  | Aetiology: ATBI | 57 | 35 | 22 | 31 | 28 | 3 | 7 | 4 | 0 | 3 | 1 | 0 | 0 | 0 | 4 |
|  | Aetiology: AHT | 21 | 20 | 1 | 8 | 2 | 6 | 18 | 12 | 4 | 2 | 1 | 1 | 1 | 2 | 11 |
|  | Aetiology: NTE | 36 | 25 | 11 | 22 | 18 | 4 | 9 | 3 | 3 | 0 | 0 | 0 | 0 | 0 | 3 |

RHs= Retinal Haemorrhages; ATBI= Accidental Traumatic Brain Injury; AHT= Abusive Head Trauma; NTE=Non-Traumatic Encephalopathy

1. Includes 2 cases with RHs seen on Indirect Ophthalmoscopy but not RetCam, 13 cases with RHs seen during a sole RetCam imaging session and 19 cases with RHs seen during serial RetCam imaging sessions.
2. One case had confluent too numerous to count haemorrhages and could not be analysed.
